# Supplementary material for: Capturing respiratory syncytial virus season in Belgium using the influenza severe acute respiratory infection surveillance network, season 2018/19
Source: PubMed Central journal article supplement (PMC7531071; doi:10.2807/1560-7917.es.2020.25.39.1900627), 2020-10-01
Supplement: 1900627_Supplement.pdf [file 1900627_Supplement.pdf]

## Supplement Table S1

**Complement to Table 1: detailed numbers of patients by age groups for symptoms, comorbidities, complications and hospitalization stay, Belgium, week 41-2018 to week 02-2019 (n=508).**

*This supplementary material is hosted by Eurosurveillance as supporting information alongside the article 'Capturing Respiratory Syncytial Virus season in Belgium using influenza Severe Acute Respiratory Infection surveillance network (season 2018-2019)' on behalf of the authors who remain responsible for the accuracy and appropriateness of the content. The same standards for ethics, copyright, attributions and permissions as for the article apply. Eurosurveillance is not responsible for the maintenance of any links of email addresses provided therein.*

|                          |              | RSV-negative     |       | RSV-positive                      |      |          |      | Total                         |       |     |      |
|--------------------------|--------------|------------------|-------|-----------------------------------|------|----------|------|-------------------------------|-------|-----|------|
|                          |              | Negative for all |       | Positive for another <sup>a</sup> |      | RSV only |      | RSV co-infection <sup>a</sup> |       |     |      |
|                          |              | n                | %     | n                                 | %    | n        | %    | n                             | %     | n   | %    |
| overall                  |              | 82               |       | 109                               |      | 232      |      | 85                            |       | 508 |      |
| age group                | <5y          | 18 <sup>b</sup>  | 22.0  | 55                                | 50.5 | 173      | 74.6 | 80                            | 94.1  | 326 | 64.2 |
|                          | ≥5y          | 64               | 78.0  | 54                                | 49.5 | 59       | 25.4 | 5                             | 5.9   | 182 | 35.8 |
| symptom (yes)            |              |                  |       |                                   |      |          |      |                               |       |     |      |
| <6m                      | fever        | 6                | 100.0 | 23                                | 95.8 | 109      | 93.2 | 40                            | 95.2  | 178 | 94.2 |
|                          | cough        | 6                | 100.0 | 21                                | 87.5 | 114      | 97.4 | 37                            | 88.1  | 178 | 94.2 |
|                          | dyspnoea     | 3                | 50.0  | 7                                 | 29.2 | 45       | 38.5 | 16                            | 38.1  | 71  | 37.6 |
| 6m-4y                    | fever        | 11               | 91.7  | 28                                | 90.3 | 55       | 98.2 | 37                            | 97.4  | 131 | 95.6 |
|                          | cough        | 11               | 91.7  | 29                                | 93.5 | 49       | 87.5 | 33                            | 86.8  | 122 | 89.1 |
|                          | dyspnoea     | 7                | 58.3  | 12                                | 38.7 | 33       | 58.9 | 24                            | 63.2  | 76  | 55.5 |
| 5-64y                    | fever        | 20               | 90.9  | 11                                | 91.7 | 15       | 88.2 | 3                             | 100.0 | 49  | 90.7 |
|                          | cough        | 19               | 86.4  | 11                                | 91.7 | 16       | 94.1 | 3                             | 100.0 | 49  | 90.7 |
|                          | dyspnoea     | 14               | 63.6  | 11                                | 91.7 | 12       | 70.6 | 2                             | 66.7  | 39  | 72.2 |
| ≥65y                     | fever        | 28               | 66.7  | 34                                | 81.0 | 32       | 76.2 | 2                             | 100.0 | 96  | 75.0 |
|                          | cough        | 30               | 71.4  | 35                                | 83.3 | 34       | 81.0 | 2                             | 100.0 | 101 | 78.9 |
|                          | dyspnea      | 36               | 85.7  | 36                                | 85.7 | 36       | 85.7 | 2                             | 100.0 | 110 | 85.9 |
| comorbidity <sup>c</sup> |              |                  |       |                                   |      |          |      |                               |       |     |      |
| <6m                      | none         | 6                | 100.0 | 20                                | 83.3 | 105      | 89.7 | 35                            | 83.3  | 165 | 87.3 |
|                          | yes          | 0                | 0.0   | 4                                 | 16.7 | 12       | 10.3 | 7                             | 16.7  | 24  | 12.7 |
|                          | chr. respi.  | 0                | -     | 0                                 | -    | 3        | -    | 2                             | -     | 5   | -    |
|                          | chr. cardio. | 0                | -     | 0                                 | -    | 1        | -    | 0                             | -     | 1   | -    |
|                          | neuromusc.   | 0                | -     | 0                                 | -    | 1        | -    | 0                             | -     | 1   | -    |
|                          | premature    | 0                | -     | 3                                 | -    | 2        | -    | 4                             | -     | 9   | -    |
|                          | tobacco      | 0                | -     | 1                                 | -    | 2        | -    | 1                             | -     | 4   | -    |
| 6m-4y                    | none         | 8                | 66.7  | 22                                | 71.0 | 35       | 62.5 | 30                            | 78.9  | 95  | 69.3 |
|                          | yes          | 4                | 33.3  | 9                                 | 29.0 | 21       | 37.5 | 8                             | 21.1  | 42  | 30.7 |
|                          | chr. respi.  | 0                | -     | 2                                 | -    | 4        | -    | 1                             | -     | 7   | -    |
|                          | asthma       | 1                | -     | 1                                 | -    | 2        | -    | 2                             | -     | 6   | -    |
|                          | chr. cardio. | 0                | -     | 0                                 | -    | 1        | -    | 1                             | -     | 2   | -    |
|                          | renal insuf. | 0                | -     | 0                                 | -    | 1        | -    | 0                             | -     | 1   | -    |
|                          | immunodef.   | 0                | -     | 1                                 | -    | 3        | -    | 1                             | -     | 5   | -    |
|                          | neuromusc.   | 0                | -     | 1                                 | -    | 5        | -    | 0                             | -     | 6   | -    |
|                          | premature    | 0                | -     | 2                                 | -    | 4        | -    | 3                             | -     | 9   | -    |
|                          | tobacco      | 0                | -     | 0                                 | -    | 1        | -    | 2                             | -     | 3   | -    |
| 5-64y                    | none         | 4                | 18.2  | 2                                 | 16.7 | 4        | 23.5 | 0                             | 0.0   | 10  | 18.5 |
|                          | yes          | 18               | 81.8  | 10                                | 83.3 | 13       | 76.5 | 3                             | 100.0 | 44  | 81.5 |
|                          | chr. respi.  | 10               | -     | 4                                 | -    | 3        | -    | 1                             | -     | 18  | -    |
|                          | asthma       | 2                | -     | 1                                 | -    | 3        | -    | 1                             | -     | 7   | -    |
|                          | chr. cardio. | 2                | -     | 3                                 | -    | 2        | -    | 1                             | -     | 8   | -    |
|                          | renal insuf. | 1                | -     | 1                                 | -    | 2        | -    | 2                             | -     | 6   | -    |
|                          | hep. insuf.  | 1                | -     | 2                                 | -    | 2        | -    | 0                             | -     | 5   | -    |
|                          | obesity      | 3                | -     | 2                                 | -    | 2        | -    | 1                             | -     | 8   | -    |
|                          | diabetes     | 1                | -     | 1                                 | -    | 2        | -    | 0                             | -     | 4   | -    |
|                          | immunodef.   | 3                | -     | 2                                 | -    | 6        | -    | 1                             | -     | 12  | -    |
|                          | neuromusc.   | 2                | -     | 3                                 | -    | 0        | -    | 0                             | -     | 5   | -    |
|                          | unknown      | 1                | -     | 0                                 | -    | 0        | -    | 0                             | -     | 1   | -    |
|                          | tobacco      | 1                | -     | 2                                 | -    | 0        | -    | 2                             | -     | 5   | -    |

|                               |                           |     |      |     |      |    |       |     |       |     |      |
|-------------------------------|---------------------------|-----|------|-----|------|----|-------|-----|-------|-----|------|
| ≥65y                          | none                      | 2   | 4.8  | 1   | 2.4  | 0  | 0.0   | 0   | 0.0   | 3   | 2.3  |
|                               | yes                       | 40  | 95.2 | 41  | 97.6 | 42 | 100.0 | 2   | 100.0 | 125 | 97.7 |
|                               | chr. respi.               | 17  | -    | 16  | -    | 18 | -     | 2   | -     | 53  | -    |
|                               | asthma                    | 2   | -    | 5   | -    | 5  | -     | 0   | -     | 12  | -    |
|                               | chr. cardio.              | 16  | -    | 21  | -    | 17 | -     | 0   | -     | 54  | -    |
|                               | renal insuf.              | 10  | -    | 12  | -    | 12 | -     | 1   | -     | 35  | -    |
|                               | hep. insuf.               | 3   | -    | 4   | -    | 2  | -     | 0   | -     | 9   | -    |
|                               | obesity                   | 10  | -    | 3   | -    | 2  | -     | 0   | -     | 15  | -    |
|                               | diabetes                  | 7   | -    | 11  | -    | 6  | -     | 2   | -     | 26  | -    |
|                               | immunodef.                | 3   | -    | 12  | -    | 13 | -     | 1   | -     | 29  | -    |
|                               | neuromusc.                | 3   | -    | 6   | -    | 6  | -     | 0   | -     | 15  | -    |
|                               | unknown                   | 1   | -    | 0   | -    | 0  | -     | 0   | -     | 1   | -    |
|                               | tobacco                   | 0   | -    | 1   | -    | 2  | -     | 0   | -     | 3   | -    |
| <hr/>                         |                           |     |      |     |      |    |       |     |       |     |      |
| antibiotics                   |                           |     |      |     |      |    |       |     |       |     |      |
| <6m                           | no                        | 2   | 33.3 | 13  | 54.2 | 83 | 70.9  | 32  | 76.2  | 130 | 68.8 |
|                               | yes                       | 4   | 66.7 | 9   | 37.5 | 29 | 24.8  | 10  | 23.8  | 52  | 27.5 |
|                               | unknown                   | 0   | -    | 0   | -    | 0  | -     | 0   | -     | 0   | -    |
|                               | missing                   | 0   | -    | 2   | -    | 5  | -     | 0   | -     | 7   | -    |
| 6m-4y                         | no                        | 7   | 58.3 | 17  | 54.8 | 26 | 46.4  | 21  | 55.3  | 71  | 51.8 |
|                               | yes                       | 5   | 41.7 | 13  | 41.9 | 29 | 51.8  | 17  | 44.7  | 64  | 46.7 |
|                               | unknown                   | 0   | -    | 0   | -    | 0  | -     | 0   | -     | 0   | -    |
|                               | missing                   | 0   | -    | 1   | -    | 1  | -     | 0   | -     | 2   | -    |
| 5-64y                         | no                        | 5   | 22.7 | 1   | 8.3  | 2  | 11.8  | 2   | 66.7  | 10  | 18.5 |
|                               | yes                       | 16  | 72.7 | 10  | 83.3 | 14 | 82.4  | 1   | 33.3  | 41  | 75.9 |
|                               | unknown                   | 0   | -    | 0   | -    | 1  | -     | 0   | -     | 1   | -    |
|                               | missing                   | 1   | -    | 1   | -    | 0  | -     | 0   | -     | 2   | -    |
| ≥65y                          | no                        | 12  | 28.6 | 5   | 11.9 | 9  | 21.4  | 0   | 0.0   | 26  | 20.3 |
|                               | yes                       | 28  | 66.7 | 37  | 88.1 | 31 | 73.8  | 2   | 100.0 | 98  | 76.6 |
|                               | unknown                   | 1   | -    | 0   | -    | 0  | -     | 0   | -     | 1   | -    |
|                               | missing                   | 1   | -    | 0   | -    | 2  | -     | 0   | -     | 3   | -    |
| <hr/>                         |                           |     |      |     |      |    |       |     |       |     |      |
| complication <sup>d</sup>     |                           |     |      |     |      |    |       |     |       |     |      |
| <6m                           | no                        | 5   | 83.3 | 22  | 91.7 | 73 | 62.4  | 26  | 61.9  | 126 | 66.7 |
|                               | yes <sup>e</sup>          | 1   | 16.7 | 2   | 8.3  | 44 | 37.6  | 16  | 38.1  | 63  | 33.3 |
|                               | pneumonia                 | 0   | -    | 1   | -    | 5  | -     | 2   | -     | 8   | -    |
|                               | ICU                       | 0   | -    | 0   | -    | 3  | -     | 2   | -     | 5   | -    |
|                               | ARDS                      | 0   | -    | 1   | -    | 5  | -     | 3   | -     | 9   | -    |
|                               | resp. assis. <sup>f</sup> | 1   | -    | 1   | -    | 40 | -     | 14  | -     | 56  | -    |
| 6m-4y                         | no                        | 4   | 33.3 | 15  | 48.4 | 31 | 55.4  | 22  | 57.9  | 72  | 52.6 |
|                               | yes                       | 8   | 66.7 | 16  | 51.6 | 25 | 44.6  | 16  | 42.1  | 65  | 47.4 |
|                               | pneumonia                 | 2   | -    | 5   | -    | 10 | -     | 8   | -     | 25  | -    |
|                               | ICU                       | 0   | -    | 0   | -    | 0  | -     | 1   | -     | 1   | -    |
|                               | ARDS                      | 0   | -    | 2   | -    | 2  | -     | 2   | -     | 6   | -    |
|                               | resp. assis.              | 6   | -    | 13  | -    | 20 | -     | 8   | -     | 47  | -    |
| 5-64y                         | no                        | 10  | 45.5 | 4   | 33.3 | 8  | 47.1  | 1   | 33.3  | 23  | 42.6 |
|                               | yes                       | 12  | 54.5 | 8   | 66.7 | 9  | 52.9  | 2   | 66.7  | 31  | 57.4 |
|                               | pneumonia                 | 7   | -    | 4   | -    | 7  | -     | 0   | -     | 18  | -    |
|                               | ICU                       | 5   | -    | 4   | -    | 3  | -     | 0   | -     | 12  | -    |
|                               | ARDS                      | 1   | -    | 2   | -    | 1  | -     | 0   | -     | 4   | -    |
|                               | resp. assis.              | 5   | -    | 4   | -    | 3  | -     | 2   | -     | 14  | -    |
| ≥65y                          | no                        | 26  | 61.9 | 21  | 50.0 | 14 | 33.3  | 1   | 50.0  | 62  | 48.4 |
|                               | yes                       | 16  | 38.1 | 21  | 50.0 | 28 | 66.7  | 1   | 50.0  | 66  | 51.6 |
|                               | pneumonia                 | 10  | -    | 16  | -    | 14 | -     | 1   | -     | 41  | -    |
|                               | ICU                       | 10  | -    | 7   | -    | 15 | -     | 1   | -     | 33  | -    |
|                               | ARDS                      | 4   | -    | 5   | -    | 6  | -     | 0   | -     | 15  | -    |
|                               | resp. assis.              | 7   | -    | 6   | -    | 14 | -     | 1   | -     | 28  | -    |
| <hr/>                         |                           |     |      |     |      |    |       |     |       |     |      |
| stay in hospital <sup>g</sup> |                           |     |      |     |      |    |       |     |       |     |      |
| <6m                           | median                    | 3   | -    | 3   | -    | 4  | -     | 4   | -     |     |      |
|                               | min                       | 2   | -    | 1   | -    | 1  | -     | 1   | -     |     |      |
|                               | 25% perc.                 | 2   | -    | 2   | -    | 3  | -     | 2   | -     |     |      |
|                               | 75% perc.                 | 5.5 | -    | 3.8 | -    | 6  | -     | 5.3 | -     |     |      |
|                               | max                       | 7   | -    | 9   | -    | 16 | -     | 14  | -     |     |      |
| 6m-4y                         | median                    | 3.5 | -    | 3   | -    | 4  | -     | 4   | -     |     |      |
|                               | min                       | 2   | -    | 1   | -    | 1  | -     | 1   | -     |     |      |
|                               | 25% perc.                 | 2   | -    | 2   | -    | 3  | -     | 3   | -     |     |      |

|       |           |      |   |      |   |      |   |     |   |
|-------|-----------|------|---|------|---|------|---|-----|---|
|       | 75% perc. | 5    | - | 4    | - | 5    | - | 5   | - |
|       | max       | 12   | - | 19   | - | 32   | - | 13  | - |
| 5-64y | median    | 7.5  | - | 10.5 | - | 10   | - | 8   | - |
|       | min       | 2    | - | 2    | - | 2    | - | 5   | - |
|       | 25% perc. | 3.8  | - | 7.3  | - | 4    | - | 5   | - |
|       | 75% perc. | 13.3 | - | 15.8 | - | 17.5 | - | 9   | - |
|       | max       | 31   | - | 104  | - | 49   | - | 9   | - |
| ≥65y  | median    | 9    | - | 9.5  | - | 8.5  | - | 7.5 | - |
|       | min       | 1    | - | 2    | - | 1    | - | 7   | - |
|       | 25% perc. | 4.8  | - | 6    | - | 5    | - | 7   | - |
|       | 75% perc. | 14.3 | - | 16   | - | 14.3 | - | 8   | - |
|       | max       | 37   | - | 87   | - | 56   | - | 8   | - |

<sup>a</sup> other respiratory viruses tested: influenza virus types A and B, human metapneumoviruses, parainfluenzaviruses (types 1, 2, 3 and 4), coronaviruses (CoV-OC43, CoV-NL63 and CoV-229E), adenoviruses, picornaviruses of the *rhinovirus* and *enterovirus* genera, specific enterovirus D68, parechovirus, and bocavirus

<sup>b</sup> number of patients and percentage within laboratory result category

<sup>c</sup> chr. respi.: chronic respiratory disease; chr. cardio.: chronic cardiovascular disease; renal insuf.: renal insufficiency; hep. insuf.: hepatic insufficiency; immunodef: immunodeficiency; neuromusc.: neuromuscular disease

<sup>d</sup> other than death

<sup>e</sup> at least one of the following: detection of pneumonia based on chest radiography; admission in intensive care unit (ICU); development of acute respiratory distress syndrome (ARDS); requirement for respiratory assistance (resp. assis.)

<sup>f</sup> including invasive and non-invasive respiratory assistance

<sup>g</sup> in days; perc.: percentile
